# Supplementary material for: ZnS quantum dot intercalated layered double hydroxide semiconductors for solar water splitting and organic pollutant degradation
Source: Royal Society of Chemistry journal article supplement (doi:10.1039/c9ta01412h), 2019-01-01
Supplement: c9ta01412h1.pdf [file c9ta01412h1.pdf]

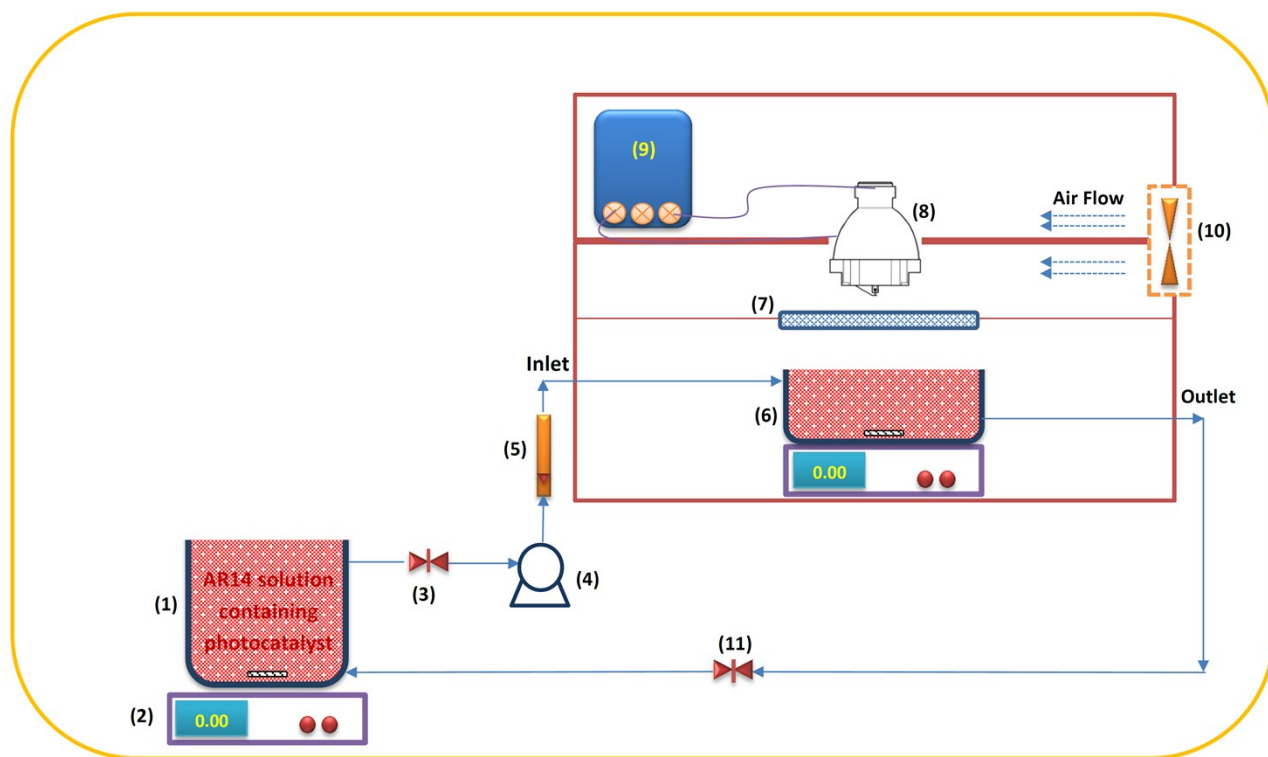

Figure S1. Schematic diagram of semicontinuous reactor utilized for photocatalytic degradation tests: 1) AR14 solution, (2) magnetic stirrer, (3) control valve, (4) peristaltic pump, (6) reactor, (7) IR and UV filters, (8) Xenon lamp, (9) Xenon lamp power supply, (10) cooling fan and (11) sampling valve.

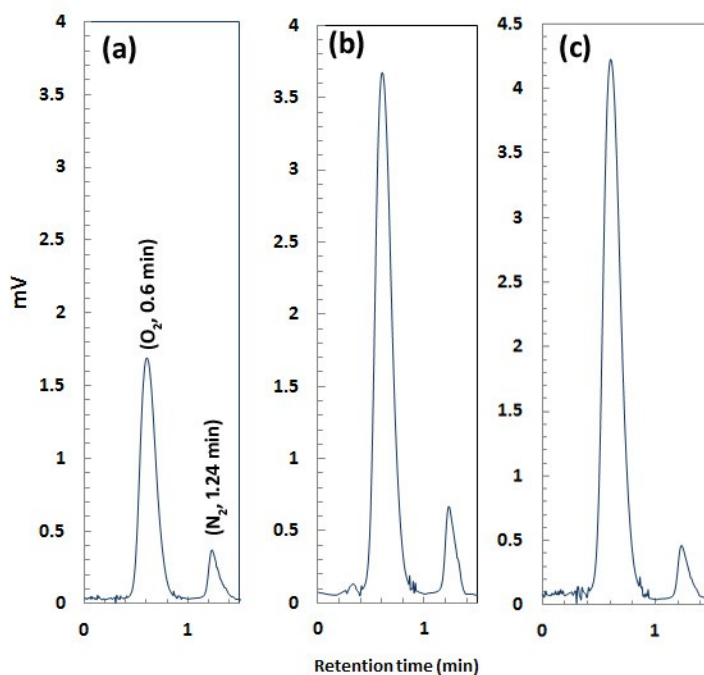

**Figure S2.** Typical GC traces of the head space in the photocatalytic oxygen evolution in the presence of (a) MnZnAl-LDH, (b) Co/ZnS and (c) Mn/ZnS samples (photocatalyst dosage=15 mg and Ag<sup>+</sup> concentration=0.01 M). The evolved oxygen gas was analyzed by gas chromatography equipped with thermal conductivity detector (TCD) and a packed GC column with 5Å molecular sieves (Agilent, GC-7890A) with an argon carrier. During the water splitting reaction under solar simulated irradiation the reactor was kept under Argon flow. After desired irradiation time, the Xenon lamp was turned off and the reaction cell was shaken to equilibrate O<sub>2</sub> concentrations in liquid and gas phases. Then, 0.1 mL of the headspace gas was sampled by a deaired gastight syringe and analyzed for oxygen evolved during photocatalytic water splitting. To eliminate the oxygen content originated from contamination of the headspace of reactor by air, the nitrogen gas in the reactor headspace was quantified. From the nitrogen content, the oxygen content related to the air in headspace was calculated and subsequently subtracted from the total O<sub>2</sub> content to determine the amount of the O<sub>2</sub> produced during photocatalytic water splitting. When 0-1% air in Ar samples were injected into GC, the ratio of O<sub>2</sub> and N<sub>2</sub> peak areas was about 0.45.

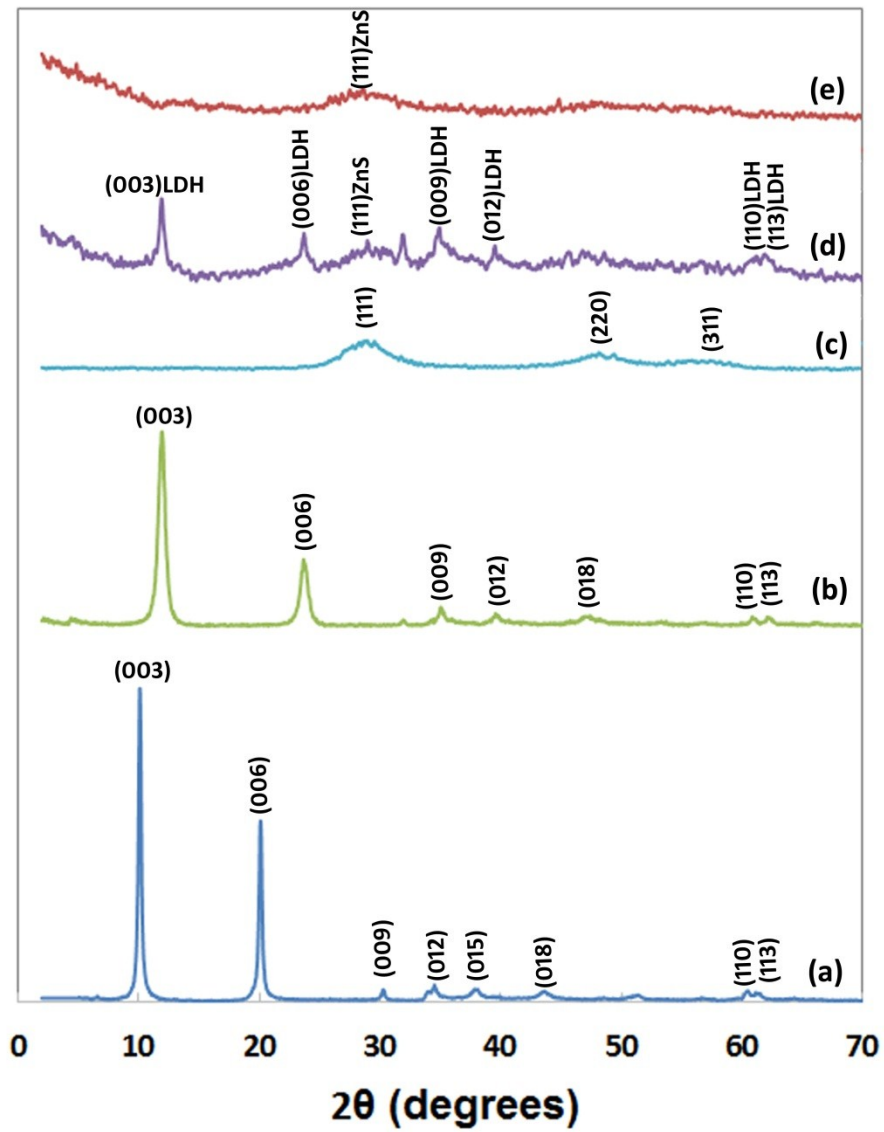

Figure S3. XRD pattern of (a) ZnAl-LDH, (b) NiZnAl-LDH, (c) ZnS QDs, (d) NiZnAl-LDH/QD, (e) NiZnAl-LDH/QD sample.

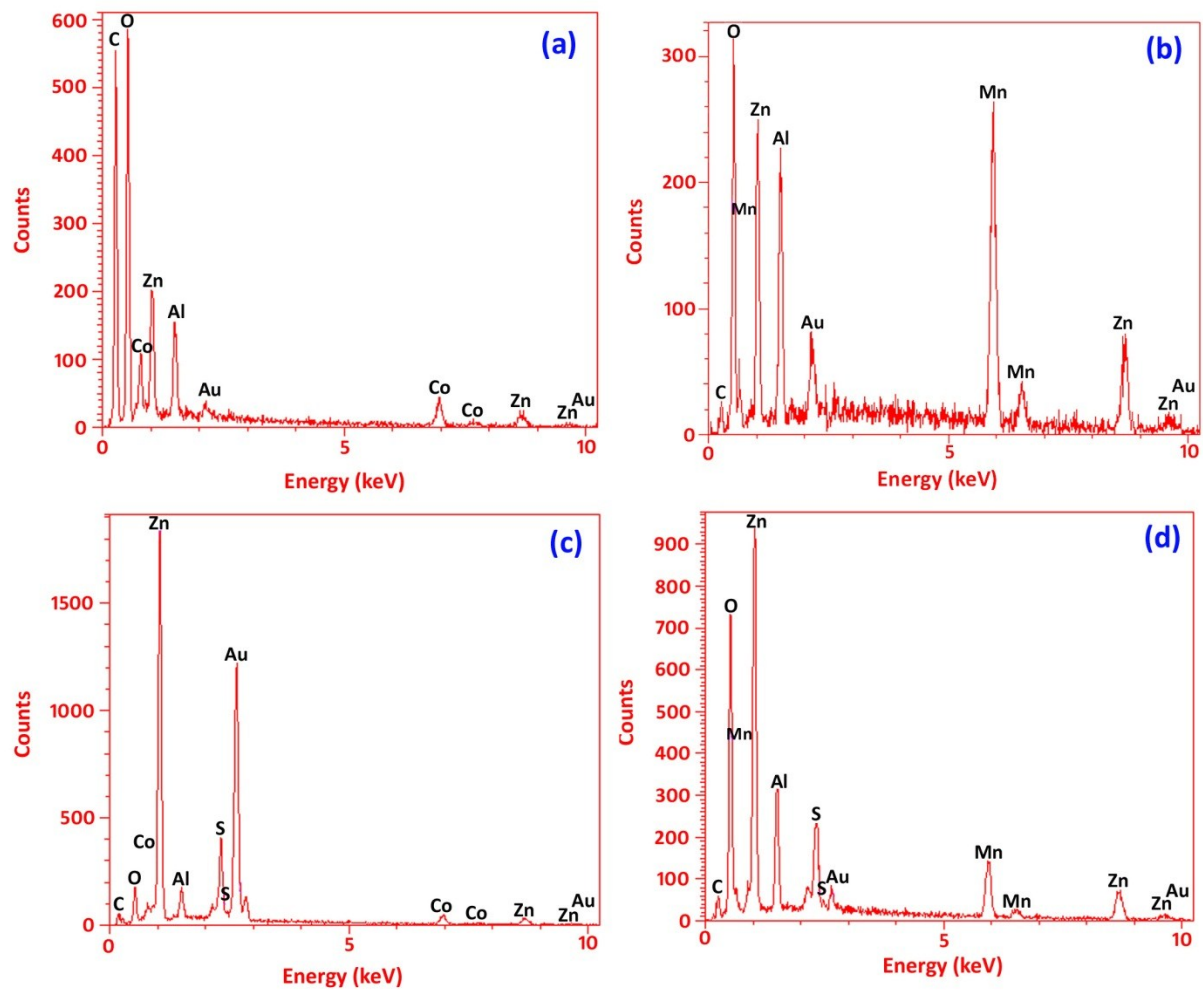

Figure S4. EDX pattern of (a) CoZnAl-LDH, (b) MnZnAl-LDH, (c) CoZnAl-LDH/QD and (d) MnZnAl-LDH/QD samples.

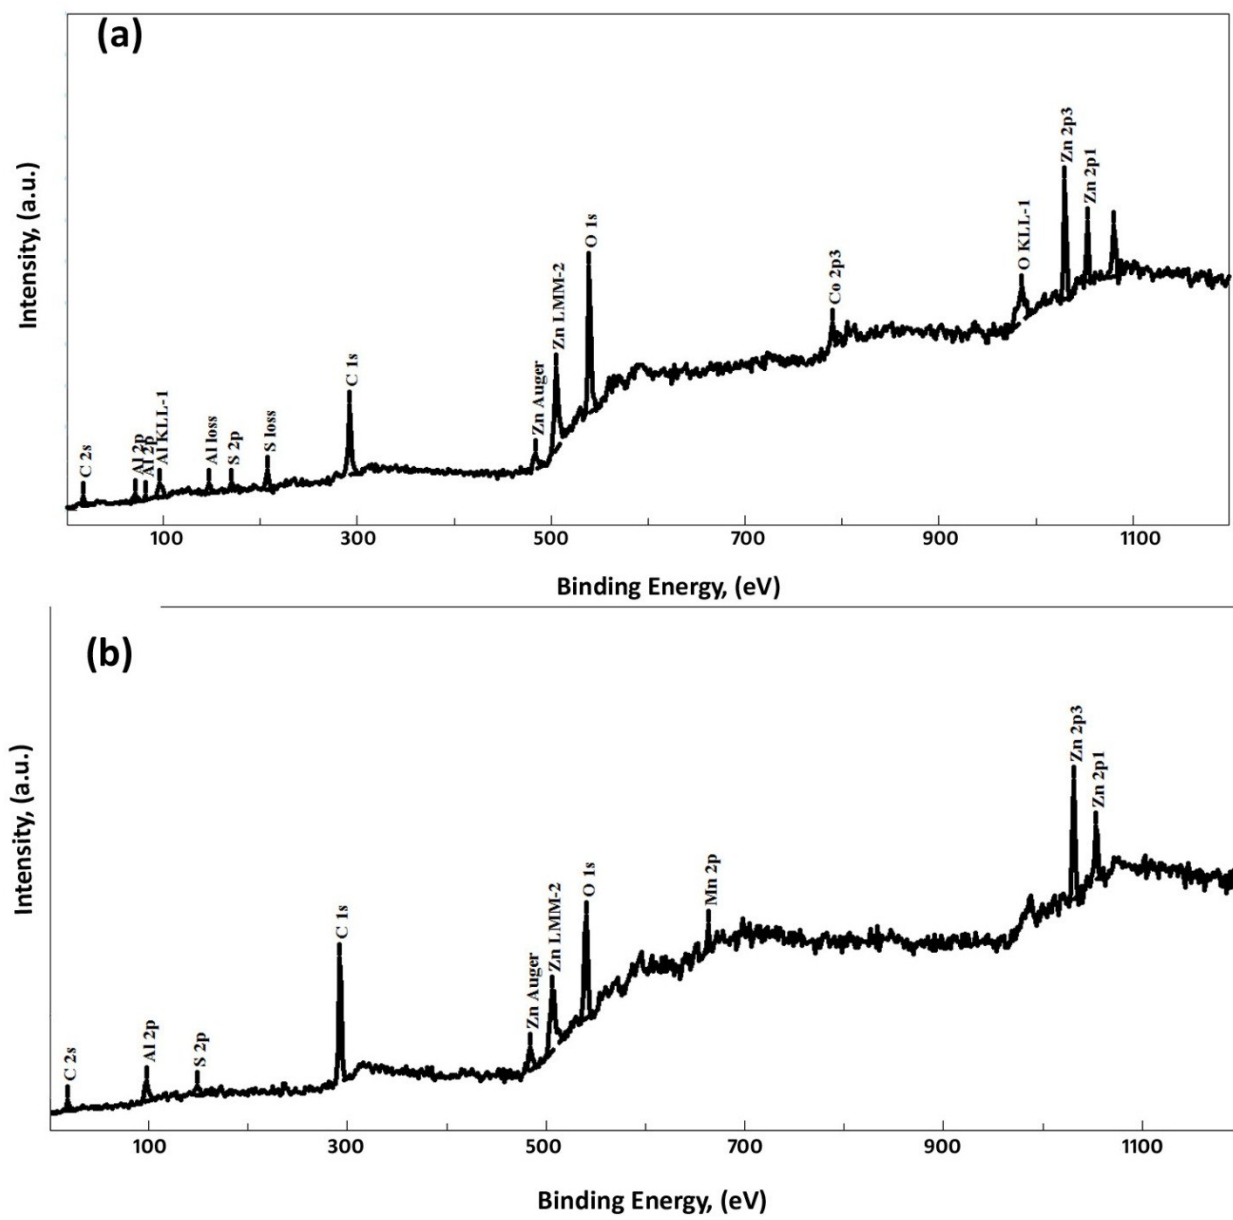

Figure S5. XPS spectra for (a) CoZnAl-LDH/QD and (b) MnZnAl-LDH/QD samples.

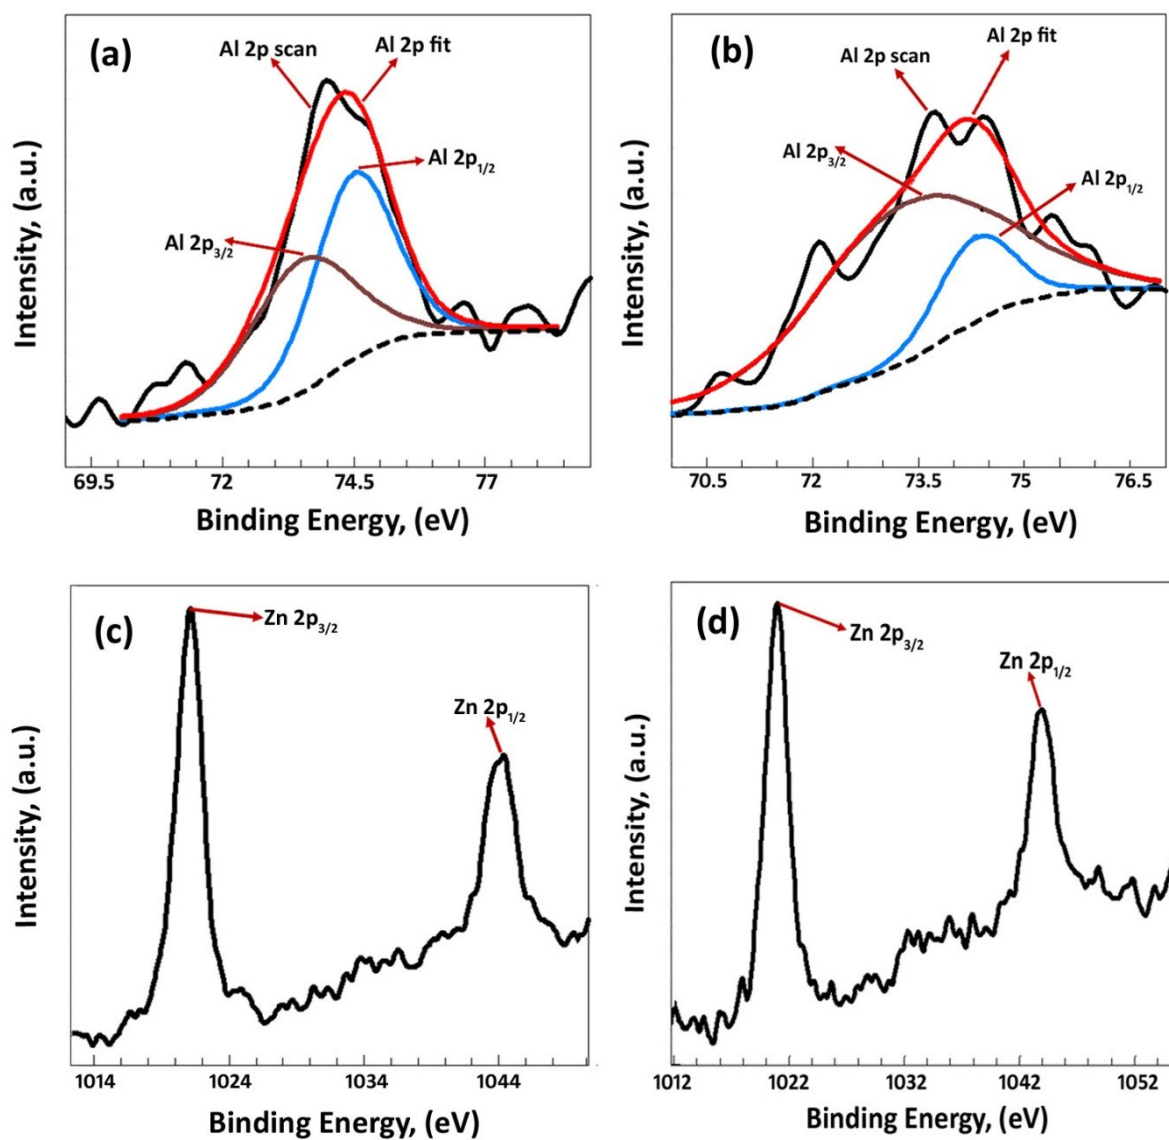

Figure S6. XPS high resolution spectra of (a) Al 2p for CoZnAl-LDH/QD, (b) Al 2p for MnZnAl-LDH/QD, (c) Zn 2p for CoZnAl-LDH/QD and (d) Zn 2p for MnZnAl-LDH/QD.

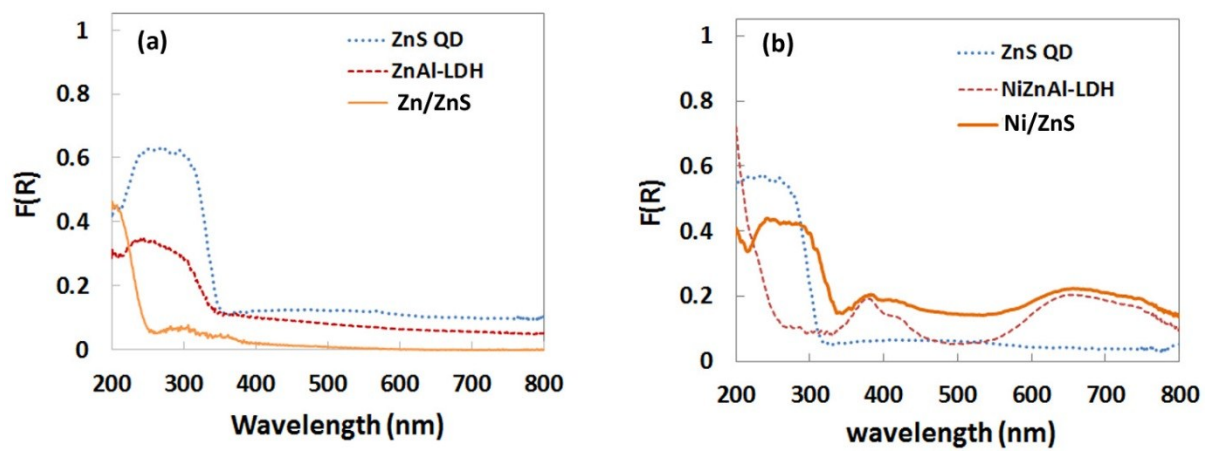

Figure S7. DRS spectra of (a) ZnAl-LDH and Zn/ZnS samples, and (b) NiZnAl-LDH and Ni/ZnS samples.

**Table S1.** QDs/binary M<sup>II</sup>M<sup>III</sup>-LDH hetrostructures and their different applications

| LDH/QD                  | Synthesis Method                                             | Intercalation of QDs in the LDH* | Application                                                                      | Ref. |
|-------------------------|--------------------------------------------------------------|----------------------------------|----------------------------------------------------------------------------------|------|
| ZnCr /CdS               | Self-assembly                                                | No                               | Visible-Light-Induced H <sub>2</sub> Generation                                  | 1    |
| ZnCr /CdSe              | Self-assembly                                                | No                               | Visible-Light-Induced H <sub>2</sub> Generation                                  | 2    |
| ZnCr /CdS               | Self-assembly                                                | Yes                              | Visible-Light-Induced H <sub>2</sub> Generation                                  | 3    |
| NiFe/CdTe-CdS           | Colloidal deposition                                         | No                               | Visible-Light-Induced H <sub>2</sub> Generation                                  | 4    |
| CdAl/CdS                | Gas/Solid Reaction                                           | No                               | Photocatalytic degradation of Rhodamine B under visible light irradiation        | 5    |
| MgAl/CdTe               | Layer by Layer                                               | No                               | Multicolor light emission                                                        | 6    |
| MgAl/CdTe               | Layer by Layer                                               | No                               | LEDs                                                                             | 7    |
| MgAl/CdSe               | Self-assembly                                                | Yes                              | Optical behavior was studied                                                     | 8    |
| NiFe/Carbon             | In situ growth                                               | No                               | Electrocatalyst for water oxidation                                              | 9    |
| MgAl/Carbon             | Colloidal deposition                                         | No                               | Adsorption of an organic dye (Methyl Blue)                                       | 10   |
| MgAl/CdTe               |                                                              | No                               | Nitrite sensing ( by chemiluminescence)                                          | 11   |
| MgAl/CdTe               | Immobilization of QDs on the surface of LDH by Self-assembly | No                               | Novel chemiluminescence probe                                                    | 12   |
| ZnAl/InP-ZnS core shell | In situ growth                                               | Yes                              | Photoluminescence, quantum yields and thermal- and photostability were enhanced. | 13   |
| ZnAl/Carbon             | In situ growth                                               | No                               | Adsorption of Cd <sup>2+</sup> from contaminated water                           | 14   |
| CoFe/Carbon             | Colloidal deposition                                         | No                               | Hydrogen peroxide sensing                                                        | 15   |
| CoAl/CdTe               | Layer by Layer                                               | No                               | Trinitrotoluene sensor                                                           | 16   |
| NiAl/Carbon             | In situ growth                                               | No                               | Supercapacitors                                                                  | 17   |

\* Is the evidence exhibited for intercalation of QDs in the interlayer space of the LDHs?



**Table S2.** LDH based photocatalysts and their efficiencies in photocatalytic O<sub>2</sub> evolution and degradation of the organic pollutants.

| Photocatalyst                                   | Target                             | Experimental conditions                                                                   | Activity                                                                                                                                            | Ref. |
|-------------------------------------------------|------------------------------------|-------------------------------------------------------------------------------------------|-----------------------------------------------------------------------------------------------------------------------------------------------------|------|
| NiTi-LDH                                        | MB <sup>a</sup>                    | 300 W Xenon lamp ( $\lambda \geq 420$ nm), 0.4 mg/L of dye and 100 mg/L of Cat.           | 99% (75 min)                                                                                                                                        | 18   |
| g-C <sub>3</sub> N <sub>4</sub> /NiFe-LDH       | H <sub>2</sub> O                   | 125 W medium pressure Hg lamp ( $\lambda \geq 420$ nm)                                    | 443 $\mu\text{mol/g.h O}_2$ , (163.5 $\mu\text{mol/g.h O}_2$ for pristine LDH)                                                                      | 19   |
| ZnFe-LDH                                        | MV <sup>b</sup><br>MG <sup>c</sup> | Sun illumination (104000 Lx), 100 mg/L of dye and 1 g/L of Cat.                           | $\geq 98\%$ (120 min)                                                                                                                               | 20   |
| Terbium doped ZnCr-LDH                          | H <sub>2</sub> O                   | 150 W Xenon lamp, ( $\lambda \geq 420$ nm)                                                | 1022 $\mu\text{mol/g.h O}_2$ , (543 $\mu\text{mol/g.h O}_2$ for pristine LDH)                                                                       | 21   |
| CdS/CoAl-LDH                                    | AR88 <sup>d</sup>                  | 500 W Xenon lamp ( $\lambda \geq 420$ nm), 100 mg/L of MB and 300 mg/L of Cat.            | 90% (180 min), (55% for pristine LDH)                                                                                                               | 22   |
| ZnTi-LDH                                        | MB                                 | 300 W Xenon lamp, ( $\lambda \geq 420$ nm), 5 mg/L of dye and 1 g/L of Cat.               | 100% (100 min)                                                                                                                                      | 23   |
| MnCr-LDH                                        | MB                                 | Visible illumination ( $360 \leq \lambda \leq 800$ nm), 30 mg/L of dye and 5 mg/L of Cat. | 90% (300 min)                                                                                                                                       | 24   |
| MgZnAl-CLDH                                     | Phenol                             | UV illumination 254 nm, 300 mg/L of Pollutant and 1 g/L of Cat.                           | 97% (540 min)                                                                                                                                       | 25   |
| CoFe-LDH                                        | H <sub>2</sub> O                   | 300 W Xenon lamp ( $\lambda \geq 420$ nm)                                                 | 333 $\mu\text{mol/g.h O}_2$                                                                                                                         | 26   |
| Zn/M-LDHs (M = Al, Fe, Ti)                      | RhB <sup>e</sup>                   | 150W halogen lamp ( $380 \leq \lambda \leq 760$ nm), 3 mg/L of dye and 666 mg/L of Cat.   | 98% for ZnTi-LDH (120 min)<br>96% for ZnAl-LDH (120 min)<br>72% for ZnFe-LDH (120 min)                                                              | 27   |
| ZnTiFe-LDH                                      | RhB                                | 150W halogen lamp ( $380 \leq \lambda \leq 760$ nm), 3 mg/L of dye and 666 mg/L of Cat.   | 88% (120 min)                                                                                                                                       | 27   |
| ZnTi, ZnCe and ZnCr LDH                         | H <sub>2</sub> O                   | 200 W xenon-doped mercury lamp ( $\lambda \geq 420$ nm)                                   | 1022 $\mu\text{mol/g.h O}_2$ (for ZnCr)<br>268.3 $\mu\text{mol/g.h O}_2$ (for ZnTi)<br>626.1 $\mu\text{mol/g.h O}_2$ (for ZnCe)<br>90% for CoCr-LDH | 28   |
| M <sup>II</sup> /Cr-LDHs (M=Co, Ni, Cu, and Zn) | MO <sup>f</sup>                    | Visible illumination ( $360 \leq \lambda \leq 800$ nm), 100 mg/L of dye and 1 g/L of Cat. | (180 min)<br>68% for NiCr-LDH<br>75% for CuCr-LDH<br>80% for ZnCr-LDH                                                                               | 29   |
| NiZnAl-LDHs                                     | OG <sup>g</sup>                    | Sun illumination (74000 Lx), 50 mg/L of dye and 500 mg/L of Cat.                          | 99% (100 min)                                                                                                                                       | 30   |
| MnCoTi-LDHs                                     | RhB                                | Tungsten lamp ( $\lambda \geq 400$ nm), 4.79 mg/L of dye and 75 mg/L of Cat.              | 99% (60 min)                                                                                                                                        | 31   |

a: Methylene Blue, b: Methyl Violet, c: Malachite Green, d: Acid Red 88, e: Rhodamin B, f: Methyl Orange, g: Orange G

**Table S3.** LDH based heterostructures used in various photocatalytic applications.

| Photocatalyst                                | Target           | Experimental conditions                                                               | Activity                                                      | Ref. |
|----------------------------------------------|------------------|---------------------------------------------------------------------------------------|---------------------------------------------------------------|------|
| Cs <sub>0.33</sub> WO <sub>3</sub> /CoAl-LDH | Tetracycline     | 500 W Xenon lamp ( $\lambda \geq 420$ nm), 40 mg/L of Pollutant and 1 g/L of Cat.     | 91.2% (270 min)                                               | 32   |
| Cu <sub>2</sub> O/MgAl-LDH                   | Orange II        | 120 W LED ( $\lambda \geq 420$ nm), 40 mg/L of Pollutant and 1 g/L of Cat.            | 90% (300 min)                                                 | 33   |
| g-C <sub>3</sub> N <sub>4</sub> /ZnIn-CLDH   | RhB              | 300 W Xenon lamp ( $\lambda \geq 420$ nm), 10 mg/L of Pollutant and 1 g/L of Cat.     | 100% (60 min)                                                 | 34   |
| TiO <sub>2</sub> /CuMgAl-LDH                 | MB               | 300 W Xenon lamp ( $\lambda \geq 420$ nm), 3.2 mg/L of Pollutant and 300 mg/L of Cat. | 67% (400 min)                                                 | 35   |
| ZnS/ZnAl-LDH                                 | RhB              | UV illumination 254 nm, 4 mg/L of Pollutant and 1 g/L of Cat.                         | 94% (180 min)                                                 | 36   |
| Graphene/ZnCr-LDH                            | RhB              | 300 W Xenon lamp ( $\lambda \geq 420$ nm), 10 mg/L of Pollutant and 1 g/L of Cat.     | 92% (140 min)                                                 | 34   |
| g-C <sub>3</sub> N <sub>4</sub> /NiAl-LDH    | RhB              | 500 W high-pressure Hg lamp, 10 mg/L of Pollutant and 600 mg/L of Cat.                | $\geq 90\%$ for MO (180 min)<br>$\geq 99\%$ for RhB (240 min) | 37   |
| RGO/NiTi-LDH                                 | H <sub>2</sub> O | 300 W Xenon lamp ( $\lambda \geq 420$ nm)                                             | 1968 $\mu\text{mol/g.h O}_2$                                  | 38   |
| CdS/CdAl-LDH                                 | RhB              | 500 W high-pressure Hg lamp, 50 mg/L of Pollutant and 1g/L of Cat.                    | $\geq 90\%$ (120 min)                                         | 5    |
| Layered titanium oxide/ZnCr-LDH              | H <sub>2</sub> O | 500 W xenon lamp ( $\lambda \geq 420$ nm)                                             | 1180 $\mu\text{mol/g.h O}_2$                                  | 39   |

**Table S4.** ZnS QDs based photocatalysts and their photocatalytic applications.

| Photocatalyst                       | Target                                | Experimental conditions                                                                        | Activity                                     | Ref. |
|-------------------------------------|---------------------------------------|------------------------------------------------------------------------------------------------|----------------------------------------------|------|
| Cu-doped ZnS QDs/TiO <sub>2</sub>   | Salicylic acide                       | Fluorescent lamp (365 nm, I = 1.5 mW/cm <sup>2</sup> ), 10 mg/L of Pollutant.                  | 90% (150 min)                                | 40   |
| ZnS QDs/chitosan                    | MB<br>MO                              | Ultraviolet-C (UVC= 280–100 nm), 20 mg/L of Pollutant and 30 mg/L of Cat.                      | 90% for MB (120 min)<br>68% for MO (240 min) | 41   |
| ZnS QDs/RGO                         | MB                                    | High pressure Hg lamp (365 nm), 10 mg/L of Pollutant and 200 mg/L of Cat.                      | ≥90% (120 min)                               | 42   |
| ZnS QDs-MgAl                        | MB                                    | High pressure Hg lamp (365 nm), 10 mg/L of Pollutant and 20 mg/L of Cat.                       | 95% (150 min)                                | 43   |
| ZnS QDs-TiO <sub>2</sub> nanofibers | MB                                    | UV lamp (365 nm), 10 mg/L of Pollutant and photocatalyst films (area of 1×1 cm <sup>2</sup> .  | ≥90% (450 min)                               | 44   |
| Mn-doped ZnS QDs                    | MO                                    | 8 W mercury vapour lamp (365 nm), 10 mg/L of Pollutant and 1 g/L of Cat.                       | 94.5% (120 min)                              | 45   |
| Tb-doped ZnS QDs                    | CV                                    | 4W UV lamp (254 nm), 500 mg/L of Cat.                                                          | 85% (120 min)                                | 46   |
| Fe-doped ZnS QDs                    | MG                                    | 40W UV lamp, 10 mg/L of Pollutant and 90 mg/L of Cat.                                          | 90% (90 min)                                 | 47   |
| ZnS QDs-mesoporus TiO <sub>2</sub>  | MB                                    | Xenon lamp, 10 mg/L of Pollutant and 50 mg/L of Cat.                                           | 100% (32 min)                                | 48   |
| M-doped ZnS QDs (M=Cu, Mn &Ag)      | VB <sup>a</sup>                       | 40W UV lamp, 10 mg/L of Pollutant and 90 mg/L of Cat.                                          | 100% (90 min)                                | 49   |
| CuInS <sub>2</sub> /ZnS QDs         | H <sub>2</sub> O (Hydrogen evolution) | 150 W Xenon lamp ( $\lambda \geq 420$ nm)                                                      | 1590 $\mu$ mol/g.h H <sub>2</sub>            | 50   |
| Ga-doped ZnS QDs                    | Phenol red                            | UV illumination                                                                                | ≥95% (140 min)                               | 51   |
| CuInS <sub>2</sub> /ZnS QDs         | RhB                                   | 500 W high-pressure Hg lamp ( $\lambda \geq 420$ nm), 10 mg/L of Pollutant and 600 g/L of Cat. | ≥95% (120 min)                               | 52   |
| ZnS QDs/MZnAl-                      | AR14                                  | 300 W Xenon lamp ( $\lambda \geq 420$                                                          | ≥95% (60 min)                                | This |

|                                |                  |                                                                                      |                                                                                    |           |
|--------------------------------|------------------|--------------------------------------------------------------------------------------|------------------------------------------------------------------------------------|-----------|
| LDH (M=Co or Mn)               |                  | nm), 50 mg/L of Pollutant and 200 mg/L of Cat.                                       |                                                                                    | Work      |
| ZnS QDs/MZnAl-LDH (M=Co or Mn) | H <sub>2</sub> O | 300 W Xenon lamp ( $\lambda \geq 420$ nm), 50 mg/L of Pollutant and 200 mg/L of Cat. | For M=Co, 1056 $\mu\text{mol/g. h O}_2$<br>For M=Mn, 1246 $\mu\text{mol/g. h O}_2$ | This Work |

a: Victoria Blue

- J. M. Lee, J. L. Gunjekar, Y. Ham, I. Y. Kim, K. Domen and S.-J. Hwang, *Chemistry – A European Journal*, 2014, **20**, 17004 – 17010.
- G. Zhang, B. Lin, Y. Qiu, L. He, Y. Chen and B. Gao, *International Journal of Hydrogen Energy*, 2015, **40**, 4758-4765.
- G. Zhang, B. Lin, W. Yang, S. Jiang, Q. Yao, Y. Chen and B. Gao, *RSC Advances*, 2015, **5**, 5823-5829.
- D. Yue, X. Qian, M. Kan, M. Ren, Y. Zhu, L. Jiang and Y. Zhao, *Applied Catalysis B: Environmental*, 2017, **209**, 155-160.
- Y. Guo, H. Zhang, Y. Wang, Z.-L. Liao, G.-D. Li and J.-S. Chen, *The Journal of Physical Chemistry B*, 2005, **109**, 21602-21607.
- R. Liang, S. Xu, D. Yan, W. Shi, R. Tian, H. Yan, M. Wei, D. G. Evans and X. Duan, *Advanced Functional Materials*, 2012, **22**, 4940-4948.
- J. S. Bendall, M. Paderi, F. Ghigliotti, N. Li Pira, V. Lambertini, V. Lesnyak, N. Gaponik, G. Visimberga, A. Eychmüller, C. M. S. Torres, M. E. Welland, C. Gieck and L. Marchese, *Advanced Functional Materials*, 2010, **20**, 3298-3302.
- B. R. Venugopal, N. Ravishankar, C. R. Perrey, C. Shivakumara and M. Rajamathi, *The Journal of Physical Chemistry B*, 2006, **110**, 772-776.
- D. Tang, J. Liu, X. Wu, R. Liu, X. Han, Y. Han, H. Huang, Y. Liu and Z. Kang, *ACS applied materials & interfaces*, 2014, **6**, 7918-7925.
- M. Zhang, Q. Yao, C. Lu, Z. Li and W. Wang, *ACS applied materials & interfaces*, 2014, **6**, 20225-20233.
- S. Dong, W. Guan and C. Lu, *Sensors and Actuators B: Chemical*, 2013, **188**, 597-602.
- S. Dong, F. Liu and C. Lu, *Analytical chemistry*, 2013, **85**, 3363-3368.
- S. Cho, S. Jung, S. Jeong, J. Bang, J. Park, Y. Park and S. Kim, *Langmuir*, 2012, **29**, 441-447.
- O. Rahmanian, M. Dinari and M. K. Abdolmaleki, *Applied Surface Science*, 2018, **428**, 272-279.
- Y. Wang, Z. Wang, Y. Rui and M. Li, *Biosensors and Bioelectronics*, 2015, **64**, 57-62.
- Z. Li, Y. Zhou, D. Yan and M. Wei, *Journal of Materials Chemistry C*, 2017, **5**, 3473-3479.
- Y. Wei, X. Zhang, X. Wu, D. Tang, K. Cai and Q. Zhang, *RSC Advances*, 2016, **6**, 39317-39322.
- P. R. Chowdhury and K. G. Bhattacharyya, *Dalton Transactions*, 2015, **44**, 6809-6824.
- S. Nayak, L. Mohapatra and K. Parida, *Journal of Materials Chemistry A*, 2015, **3**, 18622-18635.
- K. Parida and L. Mohapatra, *Chemical engineering journal*, 2012, **179**, 131-139.
- Y. Fu, F. Ning, S. Xu, H. An, M. Shao and M. Wei, *Journal of Materials Chemistry A*, 2016, **4**, 3907-3913.
- Y. Qiu, B. Lin, F. Jia, Y. Chen, B. Gao and P. Liu, *Materials Research Bulletin*, 2015, **72**, 235-240.
- M. Shao, J. Han, M. Wei, D. G. Evans and X. Duan, *Chemical engineering journal*, 2011, **168**, 519-524.
- Z. Timár, G. Varga, S. Muráth, Z. Kónya, Á. Kukovecz, V. Havasi, A. Oszkó, I. Pálincó and P. Sipos, *Catalysis Today*, 2017, **284**, 195-201.
- J. S. Valente, F. Tzompantzi, J. Prince, J. G. H. Cortez and R. Gomez, *Applied Catalysis B: Environmental*, 2009, **90**, 330-338.
- S. J. Kim, Y. Lee, D. K. Lee, J. W. Lee and J. K. Kang, *Journal of Materials Chemistry A*, 2014, **2**, 4136-4139.
- S.-J. Xia, F.-X. Liu, Z.-M. Ni, J.-L. Xue and P.-P. Qian, *Journal of Colloid and Interface Science*, 2013, **405**, 195-200.

28. C. G. Silva, Y. Bouizi, V. FornΓ©s and H. GarcιMΓa, *Journal of the American Chemical Society*, 2009, **131**, 13833-13839.
29. N. Baliarsingh, K. Parida and G. Pradhan, *Industrial & Engineering Chemistry Research*, 2014, **53**, 3834-3841.
30. X. Wang, P. Wu, Y. Lu, Z. Huang, N. Zhu, C. Lin and Z. Dang, *Separation and Purification Technology*, 2014, **132**, 195-205.
31. P. R. Chowdhury and K. G. Bhattacharyya, *RSC Advances*, 2016, **6**, 112016-112034.
32. D. Zhang, T. Ji, J. Yu, X. Jiang and F. Jiao, *Photochemistry and Photobiology*, 2018, **94**, 219-227.
33. J. Ma, J. Ding, L. Li, J. Zou, Y. Kong and S. Komarneni, *Ceramics International*, 2015, **41**, 3191-3196.
34. M. Lan, G. Fan, L. Yang and F. Li, *RSC Advances*, 2015, **5**, 5725-5734.
35. R. Lu, X. Xu, J. Chang, Y. Zhu, S. Xu and F. Zhang, *Applied Catalysis B: Environmental*, 2012, **111-112**, 389-396.
36. Z. Li, M. Chen, Q. Zhang, J. Qu, Z. Ai and Y. Li, *Applied Clay Science*, 2017, **144**, 115-120.
37. G. Salehi, R. Abazari and A. R. Mahjoub, *Inorganic Chemistry*, 2018, **57**, 8681-8691.
38. B. Li, Y. Zhao, S. Zhang, W. Gao and M. Wei, *ACS applied materials & interfaces*, 2013, **5**, 10233-10239.
39. J. L. Gunjekar, T. W. Kim, H. N. Kim, I. Y. Kim and S.-J. Hwang, *Journal of the American Chemical Society*, 2011, **133**, 14998-15007.
40. H. Labiadh, T. B. Chaabane, L. Balan, N. Becheik, S. Corbel, G. Medjahdi and R. Schneider, *Applied Catalysis B: Environmental*, 2014, **144**, 29-35.
41. A. A. P. Mansur, H. S. Mansur, F. P. Ramanery, L. C. Oliveira and P. P. Souza, *Applied Catalysis B: Environmental*, 2014, **158-159**, 269-279.
42. M. Wei, Y. Hong, D. Han, L. Yang, H. Liu and L. Su, *physica status solidi (a)*, 2018, **215**, 1800082.
43. K. Bhuvaneshwari, G. Palanisamy, T. Pazhanivel, G. Bharathi and D. Nataraj, *ChemistrySelect*, 2018, **3**, 13419-13426.
44. S. Chaguetmi, F. Mammeri, S. Nowak, P. Decorse, H. Lecoq, M. Gaceur, J. Ben Naceur, S. Achour, R. Chtourou and S. Ammar, *RSC Advances*, 2013, **3**, 2572-2580.
45. S. Joicy, R. Saravanan, D. Prabhu, N. Ponpandian and P. Thangadurai, *RSC Advances*, 2014, **4**, 44592-44599.
46. B. Poornaprakash, U. Chalapathi, Y. Suh, S. V. P. Vattikuti, M. S. P. Reddy and S.-H. Park, *Ceramics International*, 2018, **44**, 11724-11729.
47. H. R. Rajabi, O. Khani, M. Shamsipur and V. Vatanpour, *Journal of Hazardous Materials*, 2013, **250-251**, 370-378.
48. S. Harish, M. Sabarinathan, A. P. Kristy, J. Archana, M. Navaneethan, H. Ikeda and Y. Hayakawa, *RSC Advances*, 2017, **7**, 26446-26457.
49. H. R. Rajabi, F. Karimi, H. Kazemdehdashti and L. Kavoshi, *Journal of Photochemistry and Photobiology B: Biology*, 2018, **181**, 98-105.
50. M. Sandroni, R. Gueret, K. D. Wegner, P. Reiss, J. Fortage, D. Aldakov and M. N. Collomb, *Energy & Environmental Science*, 2018, **11**, 1752-1761.
51. B. Poornaprakash, U. Chalapathi, S. V. P. Vattikuti, M. C. Sekhar, B. P. Reddy, P. T. Poojitha, M. S. P. Reddy, Y. Suh and S.-H. Park, *Ceramics International*, 2019, **45**, 2289-2294.
52. W. Zhang and X. Zhong, *Inorganic Chemistry*, 2011, **50**, 4065-4072.
